# Supplementary material for: Desmosomal connectomics of all somatic muscles in an annelid larva
Source: eLife. 2022 Dec 20;11:e71231. doi: 10.7554/eLife.71231 (PMC9876572; doi:10.7554/eLife.71231)
Supplement: Figure 6—source data 1. — Text file listing weighted degree values for the most highly connected cells in the desmosomal connectome, arranged by cell class. [file elife-71231-fig6-data1.txt]

class	weighted_degree
epithelia_cell	1
hemichaetal	2
muscle	5
epithelia_cell	1
epithelia_cell	5
epithelia_cell	1
epithelia_cell	1
epithelia_cell	1
epithelia_cell	3
epithelia_cell	1
epithelia_cell	1
epithelia_cell	1
epithelia_cell	8
epithelia_cell	1
epithelia_cell	2
epithelia_cell	1
epithelia_cell	1
epithelia_cell	7
epithelia_cell	1
epithelia_cell	1
epithelia_cell	7
epithelia_cell	5
epithelia_cell	7
epithelia_cell	1
epithelia_cell	5
circumchaetal	6
epithelia_cell	1
hemichaetal	2
circumchaetal	4
epithelia_cell	4
epithelia_cell	1
epithelia_cell	2
hemichaetal	6
hemichaetal	3
epithelia_cell	9
epithelia_cell	1
epithelia_cell	5
epithelia_cell	2
epithelia_cell	1
circumacicular	48
circumacicular	49
circumacicular	34
circumacicular	25
circumacicular	12
circumacicular	49
circumacicular	31
circumacicular	39
hemichaetal	1
circumchaetal	2
epithelia_cell	3
hemichaetal	2
hemichaetal	5
epithelia_cell	4
circumchaetal	1
hemichaetal	2
hemichaetal	4
circumchaetal	8
hemichaetal	23
circumchaetal	19
circumchaetal	12
hemichaetal	1
circumchaetal	1
circumchaetal	1
hemichaetal	2
circumchaetal	1
circumchaetal	2
circumchaetal	13
hemichaetal	6
circumchaetal	2
circumchaetal	13
hemichaetal	1
epithelia_cell	14
hemichaetal	2
circumchaetal	2
epithelia_cell	2
hemichaetal	2
circumchaetal	2
circumchaetal	2
epithelia_cell	1
circumchaetal	15
circumchaetal	4
epithelia_cell	3
circumchaetal	27
epithelia_cell	2
circumchaetal	2
hemichaetal	9
hemichaetal	8
circumchaetal	4
hemichaetal	1
hemichaetal	2
hemichaetal	1
hemichaetal	2
hemichaetal	1
hemichaetal	9
circumchaetal	1
circumchaetal	3
hemichaetal	14
hemichaetal	2
epithelia_cell	1
circumchaetal	12
circumchaetal	15
epithelia_cell	6
epithelia_cell	2
epithelia_cell	2
hemichaetal	9
circumchaetal	12
hemichaetal	2
hemichaetal	13
hemichaetal	4
hemichaetal	11
epithelia_cell	2
hemichaetal	3
circumchaetal	7
circumchaetal	5
circumchaetal	12
hemichaetal	9
hemichaetal	8
epithelia_cell	3
hemichaetal	18
circumchaetal	14
epithelia_cell	2
circumchaetal	6
circumchaetal	5
epithelia_cell	1
hemichaetal	2
hemichaetal	8
hemichaetal	5
epithelia_cell	2
epithelia_cell	3
hemichaetal	3
hemichaetal	2
epithelia_cell	3
epithelia_cell	2
hemichaetal	1
hemichaetal	3
circumacicular	54
hemichaetal	3
epithelia_cell	3
hemichaetal	1
hemichaetal	4
hemichaetal	6
hemichaetal	11
epithelia_cell	5
hemichaetal	2
circumchaetal	5
epithelia_cell	1
hemichaetal	2
hemichaetal	2
circumchaetal	7
hemichaetal	13
circumchaetal	8
circumchaetal	5
hemichaetal	6
circumchaetal	9
hemichaetal	5
circumchaetal	13
hemichaetal	2
hemichaetal	2
hemichaetal	14
circumchaetal	19
hemichaetal	28
hemichaetal	15
circumchaetal	10
hemichaetal	4
hemichaetal	3
hemichaetal	11
circumchaetal	5
circumchaetal	12
circumchaetal	7
epithelia_cell	1
epithelia_cell	1
epithelia_cell	2
epithelia_cell	5
circumchaetal	1
epithelia_cell	1
epithelia_cell	1
epithelia_cell	1
epithelia_cell	1
epithelia_cell	1
circumchaetal	17
circumchaetal	11
hemichaetal	3
circumchaetal	2
circumchaetal	9
hemichaetal	4
hemichaetal	14
epithelia_cell	2
epithelia_cell	6
circumchaetal	3
hemichaetal	3
hemichaetal	7
hemichaetal	4
epithelia_cell	3
circumchaetal	1
hemichaetal	7
circumchaetal	2
hemichaetal	14
chaeta	10
hemichaetal	3
circumchaetal	1
circumchaetal	3
hemichaetal	2
chaeta	7
hemichaetal	7
hemichaetal	6
hemichaetal	2
chaeta	4
epithelia_cell	10
epithelia_cell	3
hemichaetal	13
hemichaetal	33
circumchaetal	4
circumchaetal	19
circumchaetal	6
hemichaetal	17
hemichaetal	5
hemichaetal	7
hemichaetal	7
hemichaetal	4
hemichaetal	15
hemichaetal	1
chaeta	9
epithelia_cell	1
epithelia_cell	1
epithelia_cell	3
epithelia_cell	6
epithelia_cell	4
circumchaetal	5
circumchaetal	7
hemichaetal	10
circumchaetal	4
circumchaetal	12
circumacicular	19
hemichaetal	11
circumchaetal	10
hemichaetal	1
hemichaetal	4
hemichaetal	2
hemichaetal	1
circumchaetal	5
circumchaetal	2
circumchaetal	13
hemichaetal	21
hemichaetal	11
hemichaetal	11
epithelia_cell	3
epithelia_cell	10
epithelia_cell	1
epithelia_cell	1
epithelia_cell	5
hemichaetal	6
epithelia_cell	2
hemichaetal	6
hemichaetal	11
circumchaetal	5
circumchaetal	7
hemichaetal	8
circumchaetal	1
chaeta	4
chaeta	5
hemichaetal	3
circumchaetal	10
epithelia_cell	2
circumchaetal	6
hemichaetal	2
epithelia_cell	1
circumchaetal	1
circumchaetal	1
epithelia_cell	6
epithelia_cell	5
epithelia_cell	2
hemichaetal	18
circumchaetal	15
circumchaetal	3
epithelia_cell	12
epithelia_cell	5
circumchaetal	3
circumchaetal	16
epithelia_cell	9
epithelia_cell	2
circumchaetal	27
epithelia_cell	1
circumchaetal	11
epithelia_cell	6
circumchaetal	1
epithelia_cell	4
circumchaetal	4
epithelia_cell	8
epithelia_cell	3
epithelia_cell	3
epithelia_cell	1
epithelia_cell	6
epithelia_cell	4
epithelia_cell	10
epithelia_cell	12
epithelia_cell	2
epithelia_cell	1
circumchaetal	4
epithelia_cell	2
epithelia_cell	2
epithelia_cell	2
epithelia_cell	1
epithelia_cell	5
epithelia_cell	4
epithelia_cell	2
epithelia_cell	2
epithelia_cell	6
epithelia_cell	1
epithelia_cell	8
epithelia_cell	18
epithelia_cell	3
epithelia_cell	6
epithelia_cell	4
epithelia_cell	7
epithelia_cell	3
epithelia_cell	2
epithelia_cell	10
epithelia_cell	1
epithelia_cell	4
epithelia_cell	1
epithelia_cell	5
epithelia_cell	1
epithelia_cell	2
circumchaetal	8
hemichaetal	7
epithelia_cell	4
epithelia_cell	1
circumchaetal	13
circumchaetal	13
circumchaetal	13
circumacicular	25
epithelia_cell	12
circumacicular	40
circumacicular	29
acicula	31
circumchaetal	13
hemichaetal	6
circumchaetal	7
epithelia_cell	17
circumacicular	34
circumacicular	28
circumacicular	42
epithelia_cell	4
circumacicular	21
circumacicular	17
circumacicular	37
hemichaetal	10
circumacicular	21
epithelia_cell	6
circumacicular	4
hemichaetal	16
hemichaetal	3
circumacicular	15
epithelia_cell	4
circumchaetal	13
circumacicular	29
epithelia_cell	7
circumchaetal	1
circumchaetal	13
circumchaetal	12
epithelia_cell	1
hemichaetal	19
hemichaetal	11
circumchaetal	19
hemichaetal	12
circumacicular	38
circumacicular	51
circumchaetal	11
circumchaetal	13
circumchaetal	18
epithelia_cell	4
epithelia_cell	5
epithelia_cell	9
circumacicular	45
circumacicular	31
epithelia_cell	10
epithelia_cell	2
epithelia_cell	3
epithelia_cell	1
epithelia_cell	15
epithelia_cell	3
epithelia_cell	9
epithelia_cell	1
circumacicular	41
epithelia_cell	6
circumchaetal	7
epithelia_cell	7
epithelia_cell	13
epithelia_cell	10
epithelia_cell	1
epithelia_cell	8
epithelia_cell	15
epithelia_cell	6
epithelia_cell	3
circumacicular	84
epithelia_cell	2
epithelia_cell	14
epithelia_cell	8
epithelia_cell	1
epithelia_cell	24
epithelia_cell	5
epithelia_cell	2
circumchaetal	7
epithelia_cell	7
epithelia_cell	22
epithelia_cell	19
epithelia_cell	6
epithelia_cell	24
epithelia_cell	8
epithelia_cell	7
epithelia_cell	6
epithelia_cell	9
epithelia_cell	5
circumchaetal	1
epithelia_cell	1
circumchaetal	26
circumchaetal	9
epithelia_cell	3
epithelia_cell	30
epithelia_cell	1
epithelia_cell	9
epithelia_cell	3
epithelia_cell	5
epithelia_cell	6
epithelia_cell	19
epithelia_cell	5
epithelia_cell	7
epithelia_cell	4
epithelia_cell	2
epithelia_cell	8
circumchaetal	11
circumchaetal	18
epithelia_cell	26
circumchaetal	13
circumchaetal	9
muscle	7
epithelia_cell	2
epithelia_cell	11
epithelia_cell	5
epithelia_cell	1
epithelia_cell	7
circumacicular	32
circumchaetal	3
epithelia_cell	15
epithelia_cell	12
epithelia_cell	2
epithelia_cell	5
epithelia_cell	1
epithelia_cell	15
circumchaetal	14
circumchaetal	26
epithelia_cell	1
epithelia_cell	5
epithelia_cell	29
epithelia_cell	2
epithelia_cell	8
epithelia_cell	7
epithelia_cell	7
epithelia_cell	26
epithelia_cell	5
epithelia_cell	6
circumchaetal	9
circumchaetal	6
epithelia_cell	2
epithelia_cell	1
muscle	6
epithelia_cell	4
epithelia_cell	2
epithelia_cell	12
epithelia_cell	3
epithelia_cell	1
epithelia_cell	1
epithelia_cell	4
epithelia_cell	3
epithelia_cell	2
epithelia_cell	2
epithelia_cell	2
epithelia_cell	4
epithelia_cell	8
epithelia_cell	3
epithelia_cell	12
epithelia_cell	7
epithelia_cell	3
epithelia_cell	16
epithelia_cell	3
epithelia_cell	10
epithelia_cell	5
epithelia_cell	4
epithelia_cell	1
epithelia_cell	3
epithelia_cell	14
epithelia_cell	3
epithelia_cell	10
epithelia_cell	5
epithelia_cell	14
epithelia_cell	3
epithelia_cell	29
epithelia_cell	2
epithelia_cell	23
epithelia_cell	22
epithelia_cell	1
epithelia_cell	24
epithelia_cell	7
muscle	8
epithelia_cell	2
epithelia_cell	6
epithelia_cell	16
hemichaetal	10
circumacicular	28
circumchaetal	13
hemichaetal	18
circumchaetal	17
circumchaetal	2
epithelia_cell	4
epithelia_cell	1
epithelia_cell	8
epithelia_cell	6
epithelia_cell	3
hemichaetal	1
epithelia_cell	12
epithelia_cell	8
epithelia_cell	3
epithelia_cell	4
epithelia_cell	2
epithelia_cell	6
epithelia_cell	1
epithelia_cell	4
epithelia_cell	5
epithelia_cell	13
epithelia_cell	4
epithelia_cell	23
circumchaetal	15
epithelia_cell	14
epithelia_cell	10
epithelia_cell	1
epithelia_cell	6
epithelia_cell	7
epithelia_cell	19
epithelia_cell	13
epithelia_cell	9
epithelia_cell	11
epithelia_cell	1
epithelia_cell	1
epithelia_cell	5
epithelia_cell	1
epithelia_cell	4
epithelia_cell	11
epithelia_cell	1
epithelia_cell	1
epithelia_cell	6
epithelia_cell	48
epithelia_cell	4
epithelia_cell	22
epithelia_cell	3
epithelia_cell	3
epithelia_cell	19
epithelia_cell	16
epithelia_cell	7
epithelia_cell	21
epithelia_cell	1
epithelia_cell	12
epithelia_cell	4
epithelia_cell	4
epithelia_cell	8
epithelia_cell	25
epithelia_cell	10
epithelia_cell	7
epithelia_cell	19
epithelia_cell	3
epithelia_cell	8
epithelia_cell	13
epithelia_cell	10
epithelia_cell	31
epithelia_cell	11
epithelia_cell	9
epithelia_cell	6
epithelia_cell	3
epithelia_cell	7
epithelia_cell	11
epithelia_cell	9
epithelia_cell	3
epithelia_cell	5
epithelia_cell	8
epithelia_cell	7
epithelia_cell	5
epithelia_cell	7
epithelia_cell	4
circumchaetal	5
circumchaetal	8
epithelia_cell	15
epithelia_cell	5
epithelia_cell	2
epithelia_cell	6
epithelia_cell	9
epithelia_cell	19
epithelia_cell	1
circumacicular	40
epithelia_cell	4
epithelia_cell	5
epithelia_cell	12
epithelia_cell	12
epithelia_cell	3
hemichaetal	1
epithelia_cell	3
circumacicular	17
epithelia_cell	1
epithelia_cell	14
epithelia_cell	1
epithelia_cell	15
epithelia_cell	4
epithelia_cell	2
epithelia_cell	13
epithelia_cell	6
epithelia_cell	15
epithelia_cell	9
epithelia_cell	9
circumchaetal	3
circumchaetal	5
circumchaetal	5
epithelia_cell	3
circumchaetal	8
circumchaetal	6
circumchaetal	15
epithelia_cell	2
epithelia_cell	1
epithelia_cell	2
epithelia_cell	1
circumchaetal	3
circumacicular	32
epithelia_cell	17
hemichaetal	5
hemichaetal	1
chaeta	16
muscle	2
epithelia_cell	5
epithelia_cell	6
epithelia_cell	5
epithelia_cell	15
epithelia_cell	7
epithelia_cell	4
circumacicular	10
epithelia_cell	9
hemichaetal	5
circumchaetal	1
circumchaetal	20
epithelia_cell	4
circumchaetal	23
epithelia_cell	1
epithelia_cell	4
hemichaetal	7
epithelia_cell	1
epithelia_cell	6
epithelia_cell	4
epithelia_cell	5
epithelia_cell	5
muscle	22
muscle	2
muscle	2
muscle	2
epithelia_cell	6
epithelia_cell	1
epithelia_cell	1
epithelia_cell	44
epithelia_cell	11
epithelia_cell	15
epithelia_cell	10
epithelia_cell	10
muscle	5
circumchaetal	1
circumchaetal	12
muscle	3
circumacicular	34
circumacicular	46
epithelia_cell	1
chaeta	6
epithelia_cell	4
epithelia_cell	12
chaeta	18
epithelia_cell	10
epithelia_cell	2
epithelia_cell	8
epithelia_cell	9
epithelia_cell	2
epithelia_cell	1
epithelia_cell	1
epithelia_cell	3
epithelia_cell	1
epithelia_cell	2
muscle	16
epithelia_cell	1
epithelia_cell	1
epithelia_cell	7
epithelia_cell	1
epithelia_cell	21
muscle	5
epithelia_cell	5
epithelia_cell	13
epithelia_cell	17
epithelia_cell	15
epithelia_cell	1
epithelia_cell	1
epithelia_cell	1
epithelia_cell	1
epithelia_cell	3
epithelia_cell	1
circumchaetal	11
hemichaetal	2
epithelia_cell	11
hemichaetal	3
epithelia_cell	5
epithelia_cell	35
epithelia_cell	13
epithelia_cell	2
epithelia_cell	7
muscle	5
muscle	2
chaeta	1
chaeta	12
chaeta	11
chaeta	10
chaeta	27
chaeta	29
chaeta	10
chaeta	23
circumacicular	3
chaeta	14
chaeta	8
chaeta	11
chaeta	22
chaeta	7
chaeta	4
chaeta	24
muscle	8
muscle	14
muscle	2
epithelia_cell	4
muscle	5
muscle	4
muscle	29
epithelia_cell	3
muscle	14
muscle	32
epithelia_cell	1
epithelia_cell	1
epithelia_cell	5
epithelia_cell	2
muscle	7
muscle	18
epithelia_cell	4
epithelia_cell	1
muscle	3
epithelia_cell	5
muscle	3
muscle	9
circumacicular	42
muscle	22
muscle	2
muscle	7
muscle	3
muscle	8
chaeta	3
acicula	25
muscle	8
muscle	7
muscle	8
muscle	4
muscle	7
muscle	3
chaeta	8
hemichaetal	14
muscle	26
circumchaetal	8
epithelia_cell	4
circumchaetal	17
epithelia_cell	14
epithelia_cell	2
epithelia_cell	2
epithelia_cell	3
epithelia_cell	16
muscle	6
muscle	13
muscle	8
muscle	6
epithelia_cell	2
muscle	8
epithelia_cell	1
epithelia_cell	1
epithelia_cell	2
muscle	8
epithelia_cell	4
epithelia_cell	1
muscle	6
epithelia_cell	1
muscle	4
muscle	8
epithelia_cell	5
muscle	2
muscle	6
muscle	11
muscle	11
muscle	6
muscle	4
muscle	13
epithelia_cell	1
muscle	7
epithelia_cell	10
epithelia_cell	7
epithelia_cell	4
epithelia_cell	10
circumchaetal	1
epithelia_cell	3
circumchaetal	4
circumchaetal	16
epithelia_cell	2
muscle	2
circumchaetal	2
circumchaetal	4
circumchaetal	3
muscle	15
muscle	7
muscle	16
ciliated cell	5
chaeta	9
muscle	5
muscle	4
epithelia_cell	5
epithelia_cell	27
epithelia_cell	2
muscle	1
circumchaetal	6
epithelia_cell	7
muscle	16
circumchaetal	5
epithelia_cell	4
epithelia_cell	2
muscle	4
hemichaetal	2
hemichaetal	4
epithelia_cell	11
epithelia_cell	7
muscle	12
muscle	13
muscle	24
muscle	5
muscle	5
muscle	7
muscle	13
epithelia_cell	4
muscle	10
muscle	6
muscle	7
muscle	8
muscle	11
epithelia_cell	2
muscle	6
epithelia_cell	1
epithelia_cell	5
epithelia_cell	13
muscle	4
muscle	11
muscle	5
muscle	6
muscle	3
muscle	8
muscle	16
muscle	5
muscle	9
muscle	7
epithelia_cell	3
muscle	4
muscle	3
muscle	7
epithelia_cell	15
chaeta	14
chaeta	9
chaeta	5
hemichaetal	15
chaeta	12
chaeta	8
muscle	4
muscle	1
epithelia_cell	4
muscle	2
hemichaetal	2
circumchaetal	1
chaeta	5
muscle	1
circumchaetal	2
hemichaetal	1
chaeta	3
epithelia_cell	2
hemichaetal	7
hemichaetal	2
hemichaetal	1
hemichaetal	5
hemichaetal	1
circumacicular	39
chaeta	15
circumchaetal	3
circumchaetal	1
hemichaetal	20
hemichaetal	1
circumchaetal	1
hemichaetal	3
hemichaetal	6
hemichaetal	4
hemichaetal	13
hemichaetal	2
circumchaetal	19
circumchaetal	20
hemichaetal	16
muscle	2
epithelia_cell	18
epithelia_cell	7
muscle	1
muscle	7
hemichaetal	3
muscle	11
muscle	21
muscle	16
epithelia_cell	16
muscle	16
epithelia_cell	4
epithelia_cell	8
circumchaetal	3
epithelia_cell	19
muscle	14
muscle	8
epithelia_cell	11
muscle	22
muscle	27
muscle	8
muscle	10
muscle	21
muscle	14
muscle	8
muscle	31
muscle	13
muscle	16
muscle	6
muscle	4
muscle	8
epithelia_cell	8
epithelia_cell	5
epithelia_cell	15
epithelia_cell	10
epithelia_cell	10
muscle	24
epithelia_cell	1
muscle	11
epithelia_cell	7
muscle	27
epithelia_cell	14
muscle	17
epithelia_cell	4
epithelia_cell	5
muscle	8
epithelia_cell	30
epithelia_cell	8
muscle	16
muscle	8
muscle	6
epithelia_cell	3
muscle	18
muscle	10
muscle	13
epithelia_cell	8
epithelia_cell	11
hemichaetal	17
hemichaetal	8
hemichaetal	2
hemichaetal	4
circumchaetal	12
circumacicular	34
hemichaetal	1
hemichaetal	1
hemichaetal	2
chaeta	2
hemichaetal	6
chaeta	9
chaeta	14
chaeta	7
chaeta	4
chaeta	14
chaeta	5
muscle	16
muscle	4
muscle	19
muscle	8
muscle	3
hemichaetal	2
hemichaetal	2
hemichaetal	6
epithelia_cell	4
muscle	11
muscle	8
muscle	16
chaeta	17
muscle	14
muscle	15
muscle	12
muscle	16
muscle	16
chaeta	9
chaeta	14
muscle	10
chaeta	19
chaeta	22
muscle	61
muscle	32
epithelia_cell	5
muscle	7
epithelia_cell	14
epithelia_cell	11
muscle	16
epithelia_cell	14
muscle	8
epithelia_cell	1
epithelia_cell	1
epithelia_cell	13
epithelia_cell	5
epithelia_cell	6
epithelia_cell	1
epithelia_cell	16
epithelia_cell	20
epithelia_cell	12
muscle	34
epithelia_cell	6
epithelia_cell	35
epithelia_cell	5
muscle	19
muscle	7
muscle	4
muscle	14
epithelia_cell	2
muscle	5
epithelia_cell	4
epithelia_cell	1
muscle	18
muscle	17
muscle	8
muscle	2
muscle	7
muscle	20
muscle	14
muscle	10
epithelia_cell	2
epithelia_cell	5
epithelia_cell	1
epithelia_cell	4
hemichaetal	4
epithelia_cell	1
chaeta	3
epithelia_cell	14
chaeta	1
epithelia_cell	1
epithelia_cell	1
epithelia_cell	4
epithelia_cell	41
epithelia_cell	8
epithelia_cell	13
chaeta	5
epithelia_cell	28
epithelia_cell	7
epithelia_cell	6
epithelia_cell	4
muscle	15
epithelia_cell	7
muscle	22
muscle	7
muscle	16
muscle	8
muscle	10
muscle	12
muscle	6
muscle	8
muscle	5
muscle	1
muscle	8
epithelia_cell	19
epithelia_cell	5
muscle	14
muscle	24
muscle	13
chaeta	18
muscle	5
epithelia_cell	1
chaeta	14
chaeta	1
muscle	9
chaeta	12
muscle	4
muscle	7
muscle	5
muscle	4
epithelia_cell	1
muscle	8
epithelia_cell	3
chaeta	10
muscle	34
muscle	22
muscle	4
epithelia_cell	2
epithelia_cell	2
hemichaetal	1
muscle	23
epithelia_cell	1
muscle	14
chaeta	9
epithelia_cell	7
chaeta	27
muscle	19
epithelia_cell	10
muscle	27
epithelia_cell	4
epithelia_cell	2
muscle	9
muscle	9
epithelia_cell	4
chaeta	6
epithelia_cell	1
epithelia_cell	2
muscle	6
muscle	3
chaeta	8
muscle	5
epithelia_cell	3
muscle	4
chaeta	26
epithelia_cell	1
epithelia_cell	2
muscle	5
epithelia_cell	2
muscle	20
epithelia_cell	2
muscle	17
chaeta	15
epithelia_cell	4
muscle	59
epithelia_cell	1
epithelia_cell	7
epithelia_cell	1
muscle	5
epithelia_cell	2
muscle	10
muscle	3
muscle	6
muscle	26
muscle	12
muscle	6
epithelia_cell	1
muscle	6
epithelia_cell	1
epithelia_cell	1
epithelia_cell	2
epithelia_cell	1
epithelia_cell	2
muscle	3
chaeta	8
epithelia_cell	2
epithelia_cell	1
muscle	8
epithelia_cell	1
epithelia_cell	15
epithelia_cell	1
epithelia_cell	5
epithelia_cell	1
chaeta	4
chaeta	8
epithelia_cell	4
epithelia_cell	2
muscle	2
muscle	2
chaeta	21
epithelia_cell	1
muscle	3
muscle	7
chaeta	22
muscle	5
muscle	9
muscle	7
muscle	13
muscle	6
chaeta	34
muscle	11
chaeta	16
chaeta	5
muscle	8
chaeta	19
epithelia_cell	1
muscle	11
epithelia_cell	1
muscle	6
chaeta	19
chaeta	23
chaeta	21
muscle	2
muscle	11
epithelia_cell	1
epithelia_cell	1
epithelia_cell	2
epithelia_cell	4
epithelia_cell	2
epithelia_cell	1
epithelia_cell	12
muscle	48
epithelia_cell	19
epithelia_cell	25
epithelia_cell	4
epithelia_cell	1
epithelia_cell	5
epithelia_cell	5
muscle	13
epithelia_cell	1
muscle	10
muscle	7
muscle	10
muscle	6
muscle	36
muscle	7
muscle	2
muscle	6
muscle	18
muscle	5
muscle	2
muscle	2
muscle	9
epithelia_cell	1
muscle	5
epithelia_cell	4
muscle	4
muscle	1
muscle	10
muscle	15
muscle	17
muscle	24
muscle	13
muscle	25
muscle	9
muscle	21
muscle	15
muscle	1
muscle	12
muscle	6
muscle	10
muscle	6
muscle	9
muscle	30
muscle	7
muscle	4
muscle	10
muscle	7
muscle	10
epithelia_cell	6
muscle	3
muscle	9
muscle	5
muscle	3
muscle	5
muscle	9
muscle	14
muscle	7
muscle	8
muscle	8
muscle	16
muscle	20
muscle	23
muscle	9
muscle	23
muscle	6
muscle	67
muscle	17
muscle	20
muscle	12
muscle	14
muscle	7
muscle	12
muscle	24
muscle	24
muscle	16
muscle	14
muscle	12
muscle	14
muscle	9
muscle	9
muscle	10
muscle	10
muscle	10
epithelia_cell	5
muscle	8
muscle	7
muscle	5
muscle	15
muscle	7
muscle	6
muscle	10
muscle	9
muscle	14
muscle	20
muscle	29
muscle	11
muscle	24
muscle	12
muscle	19
muscle	18
muscle	17
muscle	8
muscle	27
muscle	11
muscle	18
muscle	5
muscle	4
muscle	7
muscle	4
muscle	10
muscle	8
muscle	1
muscle	4
muscle	6
muscle	21
muscle	16
muscle	6
muscle	26
muscle	17
muscle	7
muscle	12
muscle	8
muscle	7
muscle	6
muscle	22
muscle	8
muscle	3
muscle	24
muscle	3
muscle	13
muscle	9
muscle	8
muscle	24
muscle	4
muscle	5
muscle	14
muscle	13
muscle	28
muscle	11
muscle	18
muscle	12
muscle	6
muscle	4
muscle	3
muscle	7
muscle	14
muscle	6
muscle	6
muscle	6
muscle	10
muscle	37
muscle	8
muscle	34
muscle	18
muscle	41
muscle	31
muscle	9
muscle	28
muscle	22
muscle	32
muscle	25
muscle	6
muscle	7
muscle	4
muscle	13
muscle	13
muscle	13
muscle	49
muscle	16
muscle	31
muscle	12
muscle	8
muscle	9
muscle	9
muscle	10
muscle	17
muscle	29
muscle	8
muscle	10
muscle	20
muscle	9
muscle	7
muscle	12
muscle	23
muscle	14
muscle	11
muscle	17
muscle	2
muscle	16
muscle	2
muscle	5
muscle	4
muscle	38
circumchaetal	10
muscle	5
muscle	21
muscle	7
epithelia_cell	3
muscle	9
muscle	5
muscle	13
muscle	11
epithelia_cell	2
muscle	9
muscle	8
muscle	8
muscle	21
muscle	34
epithelia_cell	9
muscle	12
epithelia_cell	4
muscle	11
muscle	7
epithelia_cell	2
muscle	11
muscle	20
muscle	15
muscle	15
muscle	11
muscle	34
muscle	7
muscle	27
epithelia_cell	29
muscle	8
muscle	6
muscle	8
muscle	6
muscle	51
muscle	7
muscle	6
muscle	19
muscle	6
muscle	6
muscle	13
muscle	23
muscle	11
muscle	7
muscle	24
muscle	18
muscle	22
muscle	19
muscle	10
muscle	31
muscle	17
muscle	27
muscle	16
muscle	12
muscle	13
epithelia_cell	5
muscle	13
epithelia_cell	8
muscle	3
epithelia_cell	7
hemichaetal	12
chaeta	18
epithelia_cell	3
epithelia_cell	6
epithelia_cell	1
muscle	20
muscle	8
muscle	8
muscle	8
muscle	8
muscle	13
muscle	25
muscle	8
muscle	58
muscle	18
muscle	22
muscle	9
muscle	18
muscle	25
muscle	39
muscle	24
muscle	2
epithelia_cell	28
muscle	7
epithelia_cell	2
muscle	4
muscle	5
muscle	17
muscle	4
muscle	3
muscle	27
muscle	10
muscle	34
muscle	4
muscle	11
epithelia_cell	1
epithelia_cell	5
epithelia_cell	6
muscle	70
muscle	24
muscle	19
muscle	7
muscle	12
muscle	20
muscle	41
muscle	9
muscle	18
muscle	14
muscle	28
muscle	6
muscle	13
muscle	15
muscle	25
muscle	12
muscle	11
muscle	9
muscle	4
muscle	11
muscle	25
muscle	21
muscle	7
muscle	6
epithelia_cell	5
muscle	21
muscle	13
muscle	33
epithelia_cell	1
epithelia_cell	18
muscle	11
muscle	23
epithelia_cell	3
muscle	21
muscle	8
muscle	14
epithelia_cell	1
epithelia_cell	4
epithelia_cell	3
ciliated cell	4
muscle	18
epithelia_cell	13
muscle	23
muscle	16
muscle	5
muscle	4
epithelia_cell	1
epithelia_cell	7
muscle	3
muscle	25
muscle	5
muscle	10
epithelia_cell	3
muscle	6
muscle	8
muscle	2
muscle	8
epithelia_cell	4
muscle	10
muscle	26
epithelia_cell	2
epithelia_cell	4
epithelia_cell	28
muscle	6
muscle	16
muscle	5
muscle	15
muscle	32
muscle	11
muscle	6
epithelia_cell	1
epithelia_cell	5
muscle	5
muscle	7
muscle	12
muscle	7
muscle	30
muscle	20
muscle	9
muscle	6
muscle	4
epithelia_cell	3
muscle	21
epithelia_cell	2
epithelia_cell	1
epithelia_cell	4
muscle	9
epithelia_cell	18
muscle	14
muscle	7
muscle	10
muscle	24
muscle	24
muscle	13
muscle	15
muscle	10
muscle	21
muscle	12
muscle	25
muscle	15
muscle	10
muscle	6
muscle	18
epithelia_cell	4
muscle	12
epithelia_cell	1
muscle	15
muscle	23
muscle	33
muscle	21
muscle	7
muscle	10
muscle	10
muscle	8
muscle	16
muscle	12
muscle	16
muscle	22
muscle	28
muscle	37
muscle	13
muscle	6
muscle	15
muscle	24
epithelia_cell	1
muscle	24
muscle	15
epithelia_cell	21
muscle	8
muscle	9
muscle	10
epithelia_cell	6
epithelia_cell	11
epithelia_cell	9
epithelia_cell	1
epithelia_cell	2
epithelia_cell	1
muscle	21
muscle	17
epithelia_cell	2
epithelia_cell	3
epithelia_cell	1
epithelia_cell	5
muscle	13
circumchaetal	8
epithelia_cell	2
muscle	8
epithelia_cell	3
epithelia_cell	1
epithelia_cell	11
muscle	9
muscle	18
muscle	1
muscle	21
muscle	3
muscle	9
muscle	12
muscle	11
muscle	9
muscle	8
muscle	34
muscle	5
muscle	5
muscle	7
muscle	5
muscle	10
muscle	18
muscle	26
muscle	4
muscle	8
muscle	17
muscle	8
muscle	13
muscle	9
muscle	21
muscle	6
acicula	15
chaeta	7
chaeta	16
chaeta	12
chaeta	22
chaeta	16
chaeta	21
chaeta	5
muscle	6
epithelia_cell	6
epithelia_cell	38
muscle	22
muscle	22
muscle	28
muscle	15
muscle	14
muscle	10
muscle	25
muscle	5
muscle	8
muscle	14
muscle	13
muscle	17
muscle	19
muscle	9
muscle	12
muscle	7
epithelia_cell	1
epithelia_cell	7
muscle	12
muscle	10
muscle	5
muscle	38
muscle	39
muscle	18
muscle	9
muscle	10
muscle	15
muscle	18
muscle	6
muscle	7
muscle	10
muscle	25
muscle	9
muscle	6
muscle	18
muscle	5
muscle	15
muscle	1
muscle	5
epithelia_cell	2
epithelia_cell	5
epithelia_cell	1
epithelia_cell	4
muscle	6
muscle	2
muscle	16
muscle	21
muscle	12
muscle	4
muscle	7
muscle	2
muscle	28
muscle	22
muscle	7
muscle	11
muscle	14
muscle	23
muscle	13
muscle	22
muscle	10
muscle	7
muscle	12
muscle	12
muscle	9
muscle	22
muscle	10
muscle	20
muscle	13
muscle	25
muscle	11
epithelia_cell	7
epithelia_cell	1
muscle	6
chaeta	17
chaeta	8
chaeta	11
chaeta	9
chaeta	10
chaeta	15
chaeta	10
chaeta	10
chaeta	12
epithelia_cell	1
ciliated cell	1
ciliated cell	9
ciliated cell	5
muscle	3
muscle	6
muscle	3
muscle	18
muscle	7
muscle	23
muscle	42
muscle	13
muscle	9
epithelia_cell	1
chaeta	12
chaeta	16
chaeta	4
chaeta	5
chaeta	25
chaeta	17
chaeta	28
chaeta	17
circumacicular	40
muscle	16
muscle	18
muscle	20
hemichaetal	4
muscle	23
muscle	19
muscle	6
muscle	8
muscle	25
muscle	23
muscle	9
epithelia_cell	2
epithelia_cell	2
epithelia_cell	9
epithelia_cell	3
epithelia_cell	10
muscle	8
muscle	20
muscle	5
muscle	7
muscle	3
muscle	5
epithelia_cell	1
epithelia_cell	2
ciliated cell	2
epithelia_cell	2
epithelia_cell	16
muscle	28
muscle	21
epithelia_cell	13
epithelia_cell	6
muscle	28
epithelia_cell	3
ciliated cell	5
ciliated cell	11
epithelia_cell	1
ciliated cell	3
epithelia_cell	1
muscle	23
muscle	8
epithelia_cell	2
epithelia_cell	12
muscle	1
muscle	37
muscle	28
muscle	17
muscle	5
muscle	11
muscle	13
muscle	8
muscle	26
muscle	14
muscle	2
ciliated cell	2
ciliated cell	2
ciliated cell	6
ciliated cell	1
muscle	4
acicula	28
acicula	42
acicula	9
acicula	13
muscle	13
muscle	17
muscle	5
muscle	11
ciliated cell	1
ciliated cell	3
ciliated cell	3
acicula	20
muscle	21
muscle	16
muscle	19
muscle	18
muscle	15
acicula	10
acicula	24
acicula	33
acicula	40
muscle	3
muscle	20
muscle	2
muscle	4
muscle	11
muscle	16
muscle	8
muscle	13
muscle	6
muscle	5
muscle	10
muscle	6
muscle	1
muscle	17
muscle	19
muscle	6
muscle	13
muscle	28
muscle	9
ciliated cell	3
ciliated cell	6
ciliated cell	22
ciliated cell	6
ciliated cell	3
ciliated cell	1
ciliated cell	11
ciliated cell	8
ciliated cell	5
ciliated cell	5
ciliated cell	9
ciliated cell	4
ciliated cell	5
ciliated cell	2
ciliated cell	10
ciliated cell	3
ciliated cell	12
ciliated cell	1
muscle	7
epithelia_cell	4
muscle	10
muscle	6
muscle	13
ciliated cell	6
muscle	12
muscle	8
muscle	19
muscle	15
muscle	11
muscle	13
muscle	21
ciliated cell	5
epithelia_cell	2
muscle	8
ciliated cell	4
epithelia_cell	11
epithelia_cell	17
muscle	41
muscle	40
muscle	4
epithelia_cell	5
epithelia_cell	10
epithelia_cell	1
muscle	9
epithelia_cell	3
epithelia_cell	11
epithelia_cell	1
ciliated cell	7
ciliated cell	2
muscle	9
muscle	7
muscle	3
muscle	5
muscle	13
muscle	9
muscle	12
muscle	10
muscle	12
muscle	10
muscle	21
epithelia_cell	11
epithelia_cell	11
ciliated cell	5
ciliated cell	4
muscle	15
ciliated cell	9
muscle	9
ciliated cell	4
muscle	13
muscle	10
muscle	10
muscle	12
muscle	12
muscle	7
epithelia_cell	9
muscle	24
muscle	10
muscle	21
ciliated cell	3
muscle	19
epithelia_cell	1
epithelia_cell	5
epithelia_cell	1
epithelia_cell	6
ciliated cell	5
epithelia_cell	16
muscle	8
muscle	6
epithelia_cell	19
muscle	29
muscle	15
muscle	23
ciliated cell	10
epithelia_cell	1
muscle	5
muscle	17
ciliated cell	6
ciliated cell	3
muscle	10
